# Supplementary material for: Triarylamine polymers by microwave-assisted polycondensation for use in organic field-effect transistors
Source: Royal Society of Chemistry journal article supplement (doi:10.1039/b808840c), 2008-01-01
Supplement: b808840c.pdf [file b808840c.pdf]

# **Triarylamine Polymers by Microwave-Assisted Polycondensation for use in Organic Field-Effect Transistors**

Masaki Horie,<sup>a</sup> Yi Luo,<sup>a,c</sup> John J. Morrison,<sup>a</sup> Leszek A. Majewski,<sup>c</sup> Aimin Song,<sup>c</sup>  
Brian R. Saunders\*<sup>b</sup> and Michael L. Turner\*<sup>a</sup>

*<sup>a</sup>Organic Materials Innovation Centre, School of Chemistry, The University of Manchester, Oxford Road, Manchester M13 9PL, UK. <sup>b</sup>School of Materials <sup>c</sup>School of EEE*

## **Supplementary Information**

### **Correspondence Address**

Prof. Michael L. Turner

Organic Materials Innovation Centre, School of Chemistry,  
The University of Manchester,  
Oxford Road, Manchester M13 9PL, UK.

Email: michael.turner@manchester.ac.uk

and

Dr. Brian R. Saunders

Polymer Science and Engineering Group, School of Materials,  
The University of Manchester,  
Grosvenor St, Manchester, M1 7HS, UK.

E-mail: brian.saunders@manchester.ac.uk

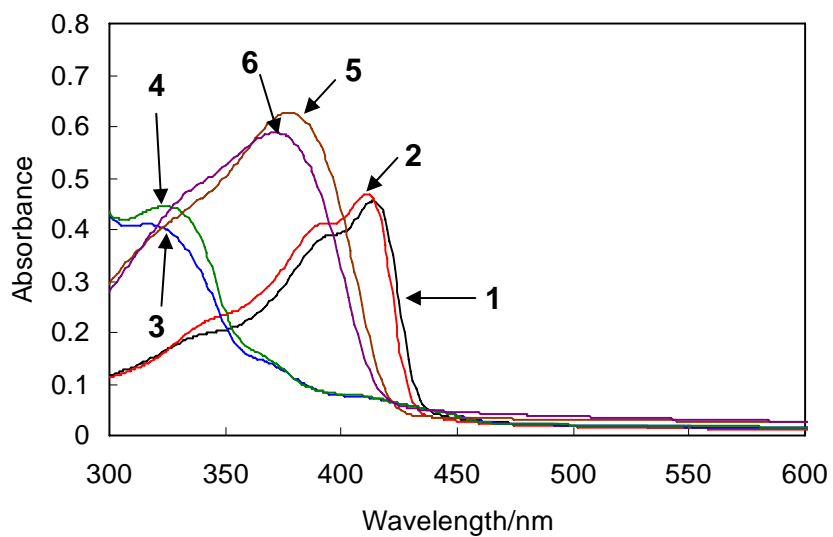

**Supporting Figure 1.** UV-vis spectra of **1 - 6** in film spin coated on glass from 1.5wt% of polymer solution in chlorobenzene.
